# Supplementary material for: B-GUT reference genome database improves biomarker discovery and fungal identification in gut metagenomes
Source: Research Square preprint supplement (doi:10.21203/rs.3.rs-6766778/v1), 2025-06-26
Supplement: Supplementary file 1 [file 991de1f4e2f1a10d8579b0d2.xlsx]

## Sheet: S1
Table S1. Results obtained in Tiara classification. First classification (class_fst_stage), second classification (class_snd_stage) only for contigs classified as organelles. Third column (Assessment) shows if the result was correct (TRUE) or incorrect (WRONG).
Sequence_id	class_fst_stage	class_snd_stage	Assessment
NZ_CP071982.1 Helicobacter pylori strain MT5135 chromosome, complete genome	bacteria	n/a	TRUE
kraken:taxid|1392246 scaffold_1 (Amniculicola lignicola)	eukarya	n/a	TRUE
scf_12295 dna:supercontig supercontig:AG_v1:scf_12295:1:1761326:1 REF (Absidia_glauca)	eukarya	n/a	TRUE
NC_060207.1 Homalodisca vitripennis isolate AUS2020 chromosome 1, UT_GWSS_2.1, whole genome shotgun sequence	eukarya	n/a	TRUE
NC_013691.1 Pseudomonas phage LUZ7, complete genome	bacteria	n/a	WRONG
NC_000962.3 Mycobacterium tuberculosis H37Rv, complete genome	bacteria	n/a	TRUE
NZ_CP045671.1 Bartonella bacilliformis strain KC584 chromosome, complete genome	bacteria	n/a	TRUE
NZ_CP072268.1 Xanthomonas euvesicatoria pv. alfalfae strain CFBP3836 chromosome, complete genome	bacteria	n/a	TRUE
CAUG01000001.1 Cryptococcus flavescens NRRL Y-50378 WGS project CAUG00000000 data, contig NODE_1_length_66939_cov_45_149673, whole genome shotgun sequence	eukarya	n/a	TRUE
SRPV01000001.1 Claviceps sorghi strain CCC 632 contig_1, whole genome shotgun sequence	eukarya	n/a	TRUE
AFRG01000001 | organism=Epichloe_glyceriae_E277 | version=2011-09-02 | length=267543 | SO=contig	eukarya	n/a	TRUE

## Sheet: S2
Table S2. A) Expected composition and taxonomy profiling obtained using a mock community data and the B-GUT kraken2 database or Standard database.
	Expected composition (%)	B-GUT db (%)	Standard db (%)
Faecalibacterium prausnitzii	14	9.84	8.22
Veillonella rogosae	14	7.53	0
Roseburia hominis	14	9.76	12.8
Bacteroides fragilis	14	8.46	8.31
Prevotella corporis	6	4.73	0
Bifidobacterium adolescentis	6	3.07	5.65
Fusobacterium nucleatum	6	6.22	5.86
Lactobacillus fermentum	6	5.32	5.79
Clostridioides difficile	1.5	1.51	1.67
Akkermansia muciniphila	1.5	1.35	1.51
Methanobrevibacter smithii	0.1	0.05	0.12
Salmonella enterica	0.01	0	0.04
Enterococcus faecalis	0.001	0.001	0.001
Clostridium perfringens	0.0001	0.001	0.001
Escherichia coli (specific strains)	14	0.99	2.77
Candida albicans	1.5	1.39	1.4
Saccharomyces cerevisiae	1.4	0.99	1.05

## Sheet: S3
Table S3. Fungal mock community detection by using B-GUT or Standard databases. 1 indicates detection, 0 missed taxa.
	B-GUT db	Standard db
Aspergillus flavus	1	0
Aspergillus fumigatus	1	1
Blastobotrys proliferans	0	0
Candida albicans	1	1
Candida dubliniensis	1	1
Candida glabrata	1	1
Candida haemulonii	1	0
Candida parapsilosis	1	0
Candida tropicalis	1	0
Clavispora lusitaniae	1	0
Naganishia albida (former Cryptococcus albidus)	1	0
Cryptococcus gattii VGI	0	1
Cryptococcus gattii VGII	0	0
Cryptococcus gattii VGIIIa	1	0
Cryptococcus gattii VGIVa	0	0
Filobasidium magnum (former Cryptococcus magnus)b	0	0
Cryptococcus neoformans VNI	1	1
Cryptococcus neoformans VNII	1	1
Cryptococcus neoformans VNIV	1	1
Cyberlindnera jadinii	1	0
Debaryomyces hansenii	1	1
Diutina catenulata (former Candida catenulata)b	0	0
Diutina mesorugosa (former Candida mesorugosa) b	0	0
Diutina rugosa (former Candida rugosa) b	1	0
Geotrichum candidum	1	0
Geotrichum fermentans	0	0
Kluyveromyces marxianus	1	1
Kodamaea ohmeri	0	0
Lomentospora prolificans	1	0
Meyerozyma caribbica	0	0
Meyerozyma guilliermondii	1	0
Pichia kudriavzevii	1	1
Pichia membranifaciens	1	0
Pichia norvegensis	0	0
Purpureocillium lilacinum c	1	0
Rhodotorula mucilaginosa	1	0
Scedosporium aurantiacum	0	0
Scedosporium boydii (former Pseudallescheria boydii)	0	0
Trichophyton rubrum	0	0
Trichosporon asahii	1	0
Cutaneotrichosporon dermatis (former Trichosporon dermatis)	0	0
Wickerhamomyces anomalus	1	0
Yarrowia lipolytica	0	1
Zygoascus hellenicus d	1	0
	28	12

## Sheet: S4
Table S4. List of differential abundant fungal species detected using the different assembly-database approaches.
T2T-B-GUT
Rank6	Rank7	padj	log2FoldChange
g__Saccharomyces	s__cerevisiae	0.0232988	0.799552
g__Saccharomyces	s__paradoxus	0.00293174	0.660322
g__Kluyveromyces	s__marxianus	0.00300221	0.530981
g__Monosporascus	s__sp. 5C6A	0.0118038	0.387168
g__Rhexocercosporidium	s__sp. MPI-PUGE-AT-0058	0.0118038	-0.348231
g__Emmonsia	s__crescens	0.0411124	0.30256
g__Ophiobolus	s__disseminans	0.043224	0.335956
g__Verpa	s__conica	0.00743992	0.502476
g__Hemileia	s__vastatrix	0.00161484	0.448232
g__Melampsora	s__lini	0.000150606	0.696391
g__Rhizophagus	s__irregularis	0.00422298	0.431924
g__Zoophthora	s__radicans	0.0233617	0.257699
g__Umbelopsis	s__isabellina	0.0118912	-0.36406
g__Elaphomyces	s__granulatus	0.0118038	-0.346107
g__Candida	s__maltosa	0.0144202	0.34646
g__Trametes	s__pubescens	0.0232988	0.395554
T2T-B-GUTc
Rank6	Rank7	padj	log2FoldChange
g__	s__	0.0110483	0.581521
g__Hemileia	s__vastatrix	0.0110483	0.335541
g__Melampsora	s__lini	0.0110483	0.557904
g__Aspergillus	s__austroafricanus	0.0457352	-0.331864
g__Spathaspora	s__arborariae	0.0360172	-0.446438
GRCh38-B-GUT
Rank6	Rank7	padj	log2FoldChange
g__Monosporascus	s__sp. 5C6A	0.00690947	0.395826
g__Rhexocercosporidium	s__sp. MPI-PUGE-AT-0058	0.00580525	-0.367267
g__Byssothecium	s__circinans	0.00303349	-0.407033
g__Friedmanniomyces	s__simplex	2.57e-05	-0.582393
g__Verpa	s__conica	0.00612528	0.493021
g__Hemileia	s__vastatrix	0.000584423	0.464431
g__Melampsora	s__lini	0.000229941	0.653153
g__Heterodoassansia	s__hygrophilae	0.00612528	-0.391583
g__Rhizophagus	s__irregularis	0.00226195	0.450896
g__Zoophthora	s__radicans	0.0271871	0.253427
g__Saccharomyces	s__cerevisiae	0.0202509	0.800753
g__Umbelopsis	s__isabellina	0.0120292	-0.356141
g__Candida	s__maltosa	0.00819891	0.355917
g__Saccharomyces	s__paradoxus	0.00198124	0.667306
g__Kluyveromyces	s__marxianus	0.00325975	0.510561
g__Trametes	s__pubescens	0.0218345	0.391475
g__Elaphomyces	s__granulatus	0.00612528	-0.359995
g__Cerrena	s__unicolor	0.0251502	-0.276851
GRCh38-B-GUTc
Rank6	Rank7	padj	log2FoldChange
g__Aspergillus	s__keveii	0.0442799	-0.302261
g__	s__	0.0135259	0.578668
g__Hemileia	s__vastatrix	0.0135259	0.341767
g__Melampsora	s__lini	0.0136858	0.551868
g__Aspergillus	s__austroafricanus	0.0430096	-0.330698
g__Penicillium	s__griseofulvum	0.0430096	-0.354777
g__Spathaspora	s__arborariae	0.0430096	-0.440571
