# Supplementary material for: B-GUT reference genome database improves biomarker discovery and fungal identification in gut metagenomes
Source: Research Square preprint supplement (doi:10.21203/rs.3.rs-6766778/v1), 2025-06-26
Supplement: Supplementary file 1 [file bce736a8d8b7e15f55bb5880.pdf]

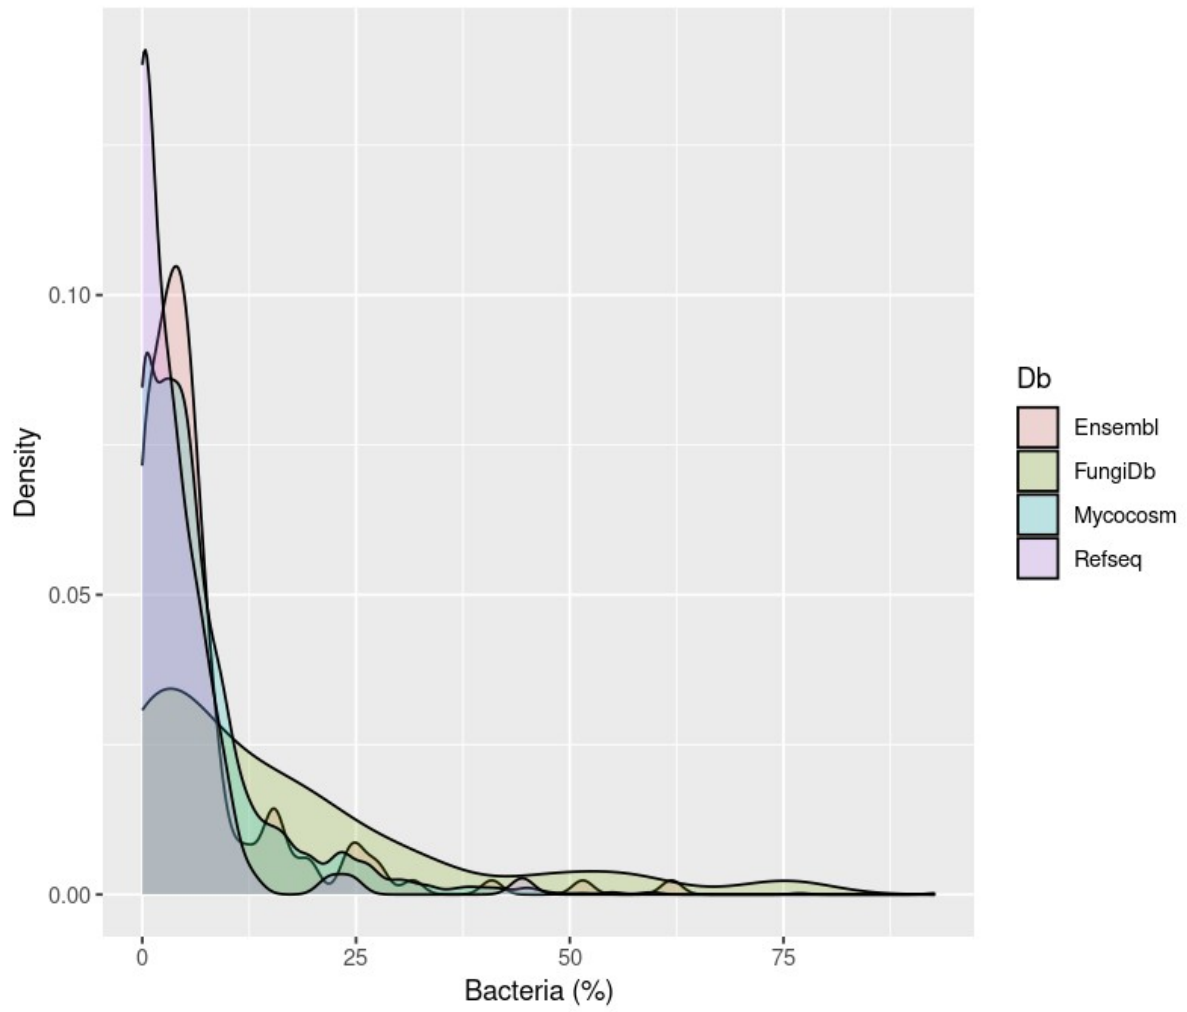

**Figure S1.** Smoothed version of the histogram representing the % of bacteria according to the different databases.

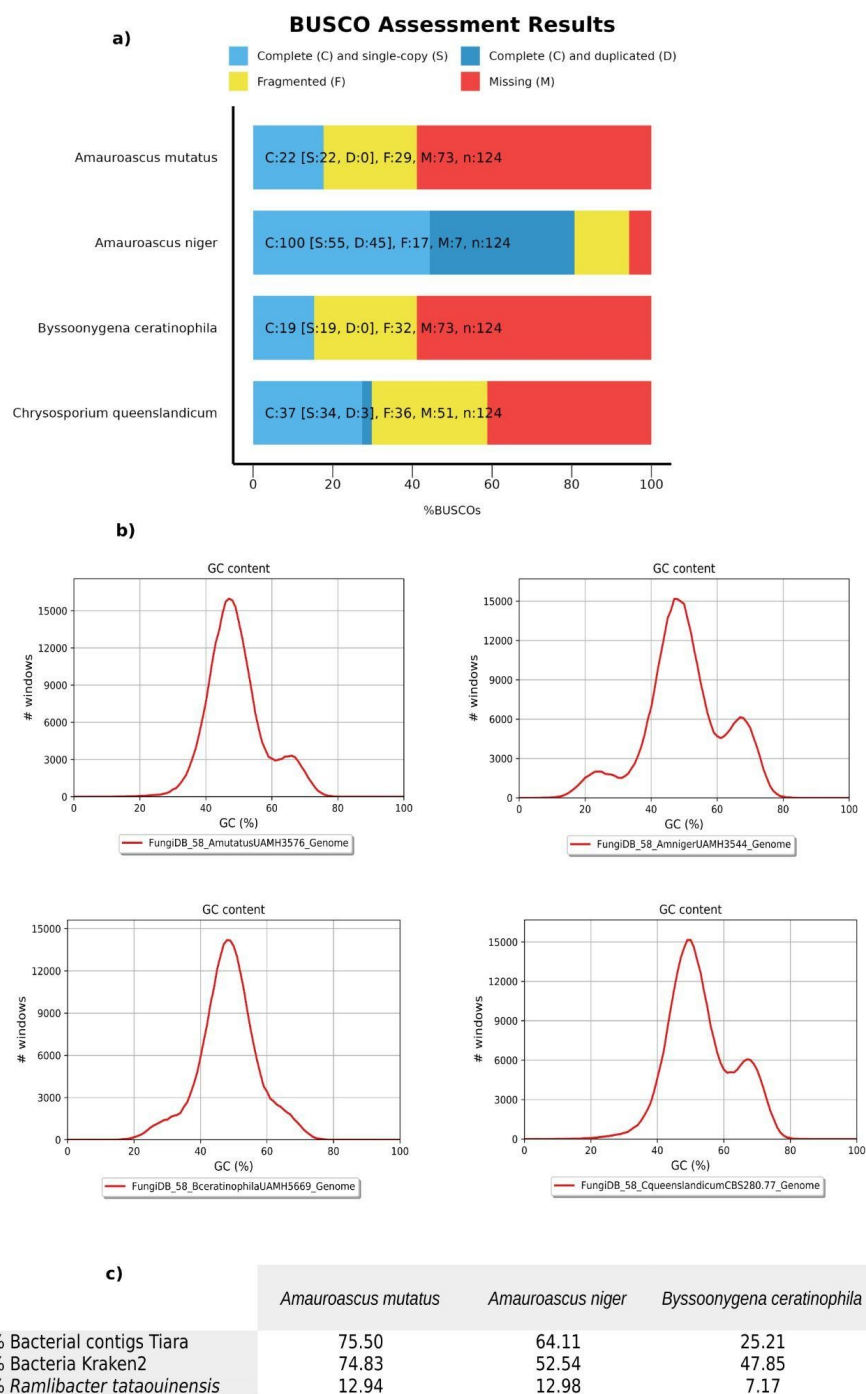

**Supplementary figure S2.** Metrics suggesting potential contamination of *Amauroascus mutatus*, *Amauroascus niger*, *Byssoonygena ceratinophila* and *Chrysosporium queenslandicum*. A) BUSCO results using the bacterial lineage database. B) GC content distribution. C) Table summarizing the percentage of contigs classified as bacteria using Tiara, and the percentage of Bacteria and of *Ramlibacter tataouinensis* species detected by Kraken2 using the standard database.

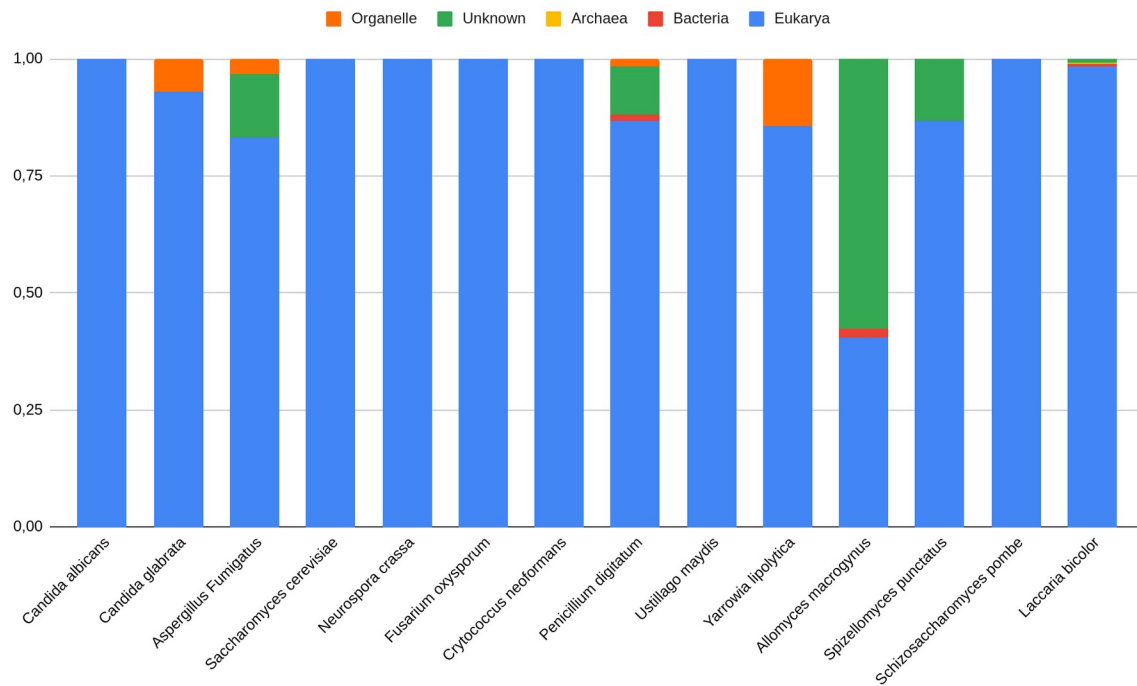

**Supplementary Figure S3.** Tiara classification of 14 fungal models. At the y axis it is represented by the % ( At scale from 0 to 1) of contigs classified at each category (Organelle, Unknown, Archaea, Bacteria or Eukarya).

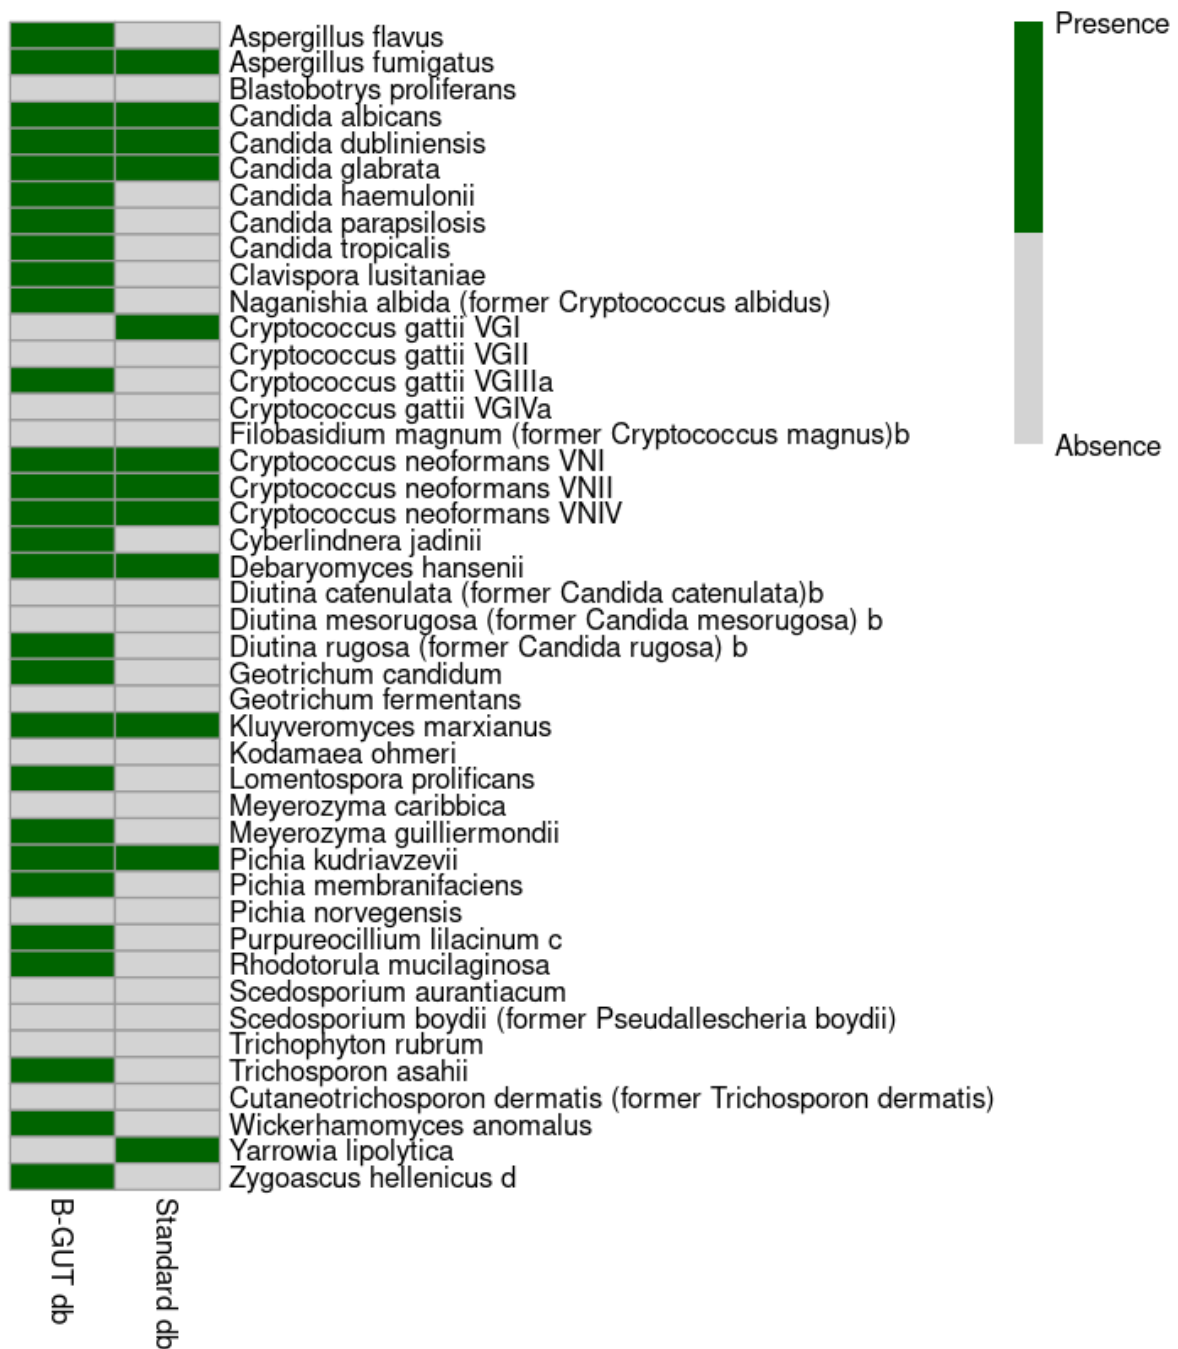

**Supplementary Figure S4.** Heatmap representing the presence or absence of the fungal species included in the fungal mock. Green indicates correct assignment. Green represents presence and grey absence.

**Supplementary Table S1.** Assignment by kraken2 of mock communities, using a version of the B-GUT database with hybrids (B-GUT with hybrids) and the Standard kraken2 database.

OUR MOCK (ZymoBIOMICS® Gut Microbiome Standard, reference D6331, ZymoResearch)

|                                 | Expected composition (%) | B-GUT with hybrids | Standard db |
|---------------------------------|--------------------------|--------------------|-------------|
| <i>Candida albicans</i>         | 1,5                      | 1,38               | 1,41        |
| <i>Saccharomyces cerevisiae</i> | 1,4                      | 0,23               | 1,05        |

MOCK from study: <https://pmc.ncbi.nlm.nih.gov/articles/PMC7355182/>

|                                 | Expected composition (%) | B-GUT with hybrids | Standard db |
|---------------------------------|--------------------------|--------------------|-------------|
| <i>Saccharomyces cerevisiae</i> | 2                        | 0,35               | 1,95        |
| <i>Cryptococcus neoformans</i>  | 2                        | 1,41               | 3,06        |

Supplementary tables:

[https://docs.google.com/spreadsheets/d/](https://docs.google.com/spreadsheets/d/1eYhusAQlu3mqA84VL0uiKyFDD5dYiBQm0nO1nL0XVdl/edit?usp=sharing)

[1eYhusAQlu3mqA84VL0uiKyFDD5dYiBQm0nO1nL0XVdl/edit?usp=sharing](https://docs.google.com/spreadsheets/d/1eYhusAQlu3mqA84VL0uiKyFDD5dYiBQm0nO1nL0XVdl/edit?usp=sharing)
